# Supplementary material for: Assessing the Suitability of Fractal Dimension for Measuring Graphic Complexity Change in Schematic Metro Networks
Source: MDPI journal article supplement (doi:10.3390/ijgi13020038), 2024-01-25
Supplement: s1 [file s1]

地铁运营线路图简化认知实验（官方）

示意化网络地图是对现实世界中的地理网络进行简化表达的一类地图，旨在帮助人们快速、精确地进行路线规划和导航等任务。**地铁运营线路图**是最常见的示意化网络地图之一。在该种地图中，线路的真实形状被**简化**以提升用户使用时的体验

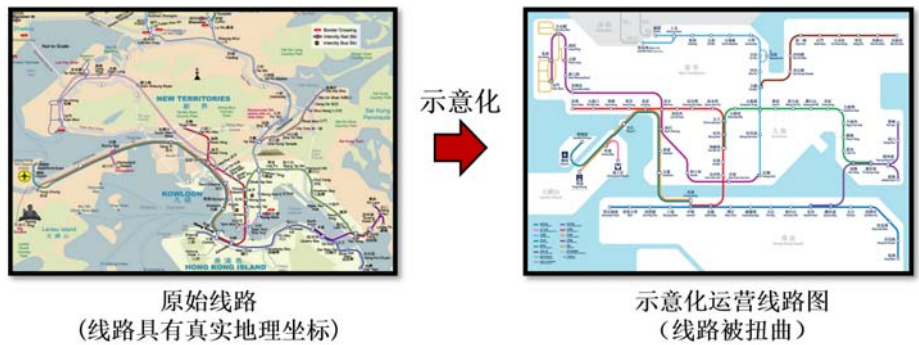

在本次实验中，我们收集了全国26个重要城市的地铁原始线路与对应的示意化地铁运营线路图。参与本次实验的用户将从**人主观认知的角度**对运营线路图**相对于原始线路的复杂度变化**进行打分(5分：变化非常大，4分：变化较大，3分：变化中等，2分：变化较小，1分：变化非常小)

示例1：复杂度变化非常大

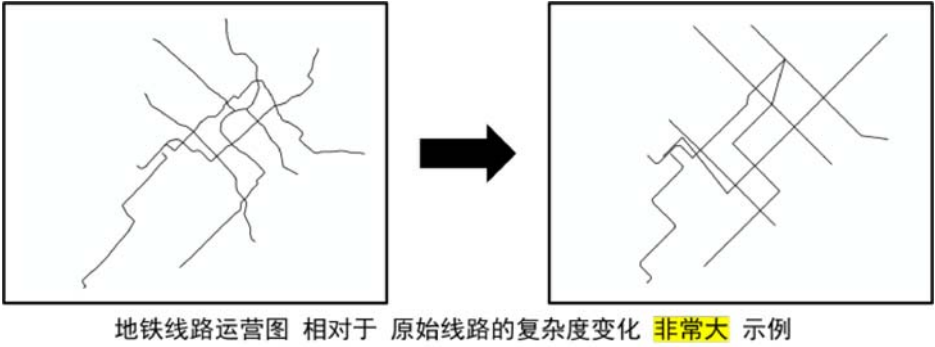

示例2：复杂度变化中等

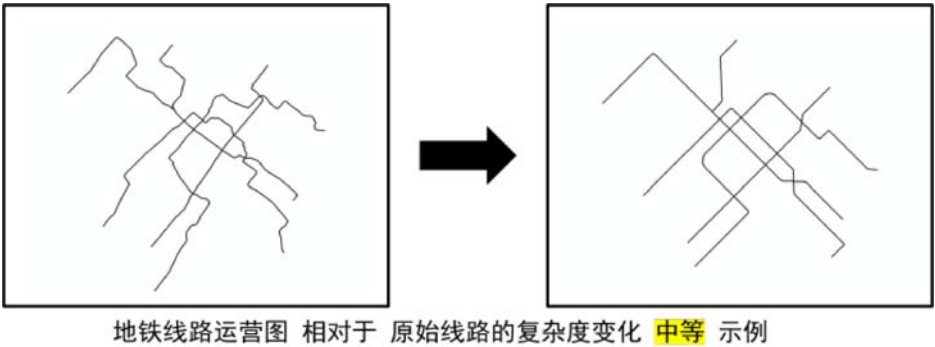

示例3：复杂度变化非常小

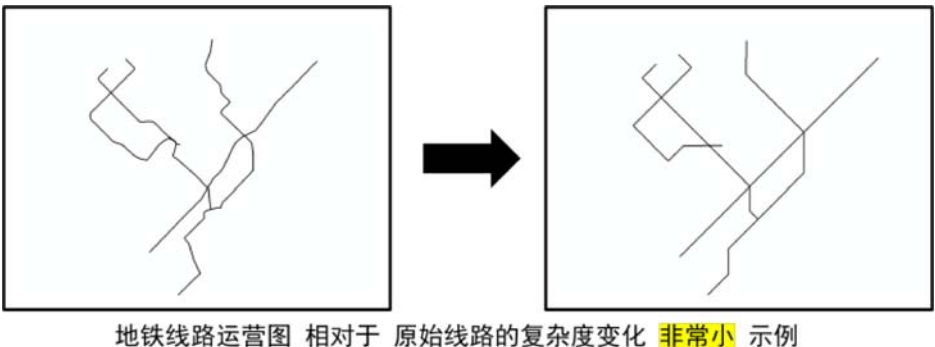

如对问卷内容有任何问题需要咨询，可以联系邮箱：tianlan@swjtu.edu.cn（蓝老师），

hzhang@re.ecnu.edu.cn（张老师）和 wuzhiwei@my.swjtu.edu.cn（吴博士），非常感谢！

本问卷调查的设计人员来自：

1. 华东师范大学城市与区域科学学院, 上海 200062, 中国
2. 西南交通大学地球科学与环境工程学院, 成都 611756, 中国
3. 香港理工大学土地测量与地理资讯学系, 香港特别行政区 999077, 中国

1. 参与者性别[单选题] \*

- ☐ 男
- ☐ 女

2. 年龄[单选题] \*

- ☐ 小于18岁
- ☐ 18到30岁
- ☐ 31到40岁
- ☐ 41到50岁
- ☐ 51到60岁
- ☐ 61到70岁
- ☐ 70岁以上

3. 是否曾经学习或接触过“地图设计”等地图学相关内容? [单选题] \*

- ☐ 是
- ☐ 否

4. 请对北京地铁线路运营图相对于原始线路的复杂度变化进行打分





北京地铁原始线路

北京地铁线路运营图

[矩阵量表题] \*

|       | 1 (非常小)               | 2 (较小)                | 3 (中等)                | 4 (较大)                | 5 (非常大)               |
|-------|-----------------------|-----------------------|-----------------------|-----------------------|-----------------------|
| 复杂度变化 | <input type="radio"/> |

5. 请对上海地铁线路运营图相对于原始线路的复杂度变化进行打分

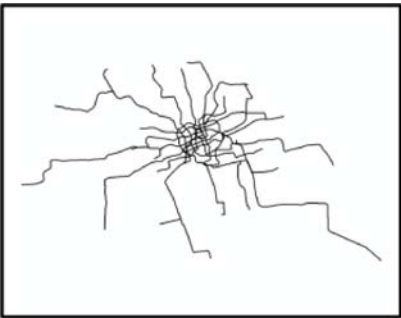



上海地铁原始线路

上海地铁线路运营图

[矩阵量表题] \*

|       | 1 (非常小)               | 2 (较小)                | 3 (中等)                | 4 (较大)                | 5 (非常大)               |
|-------|-----------------------|-----------------------|-----------------------|-----------------------|-----------------------|
| 复杂度变化 | <input type="radio"/> |

6. 请对广州地铁线路运营图相对于原始线路的复杂度变化进行打分

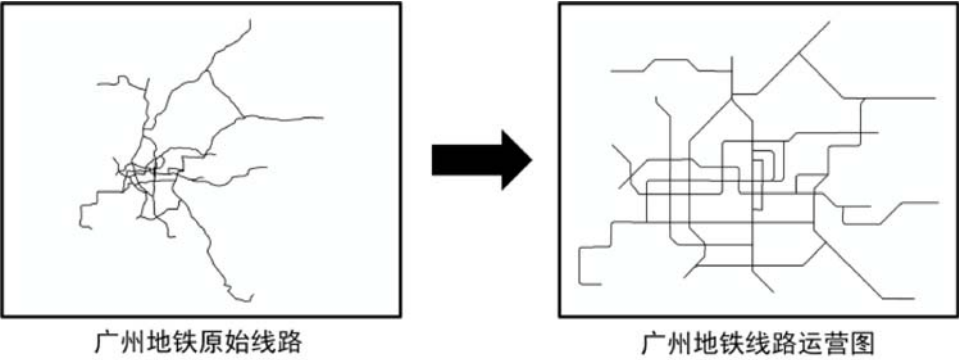

[矩阵量表题] \*

|       |                       |                       |                       |                       |                       |
|-------|-----------------------|-----------------------|-----------------------|-----------------------|-----------------------|
|       | 1 (非常小)               | 2 (较小)                | 3 (中等)                | 4 (较大)                | 5 (非常大)               |
| 复杂度变化 | <input type="radio"/> |

7. 请对深圳地铁线路运营图相对于原始线路的复杂度变化进行打分

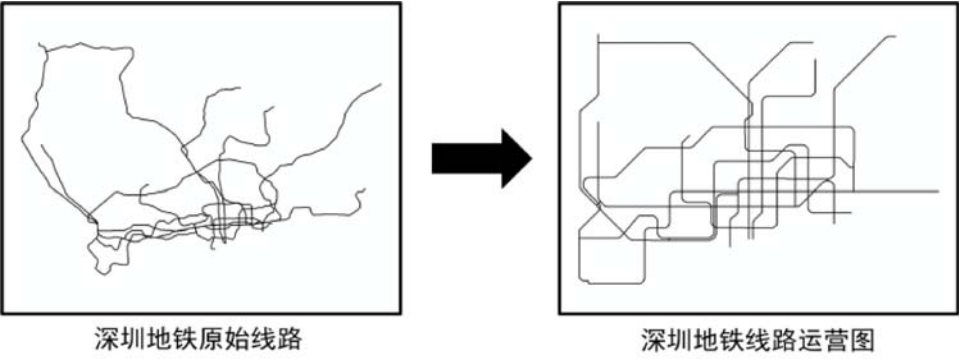

[矩阵量表题] \*

|       |                       |                       |                       |                       |                       |
|-------|-----------------------|-----------------------|-----------------------|-----------------------|-----------------------|
|       | 1 (非常小)               | 2 (较小)                | 3 (中等)                | 4 (较大)                | 5 (非常大)               |
| 复杂度变化 | <input type="radio"/> |

8. 请对香港地铁线路运营图相对于原始线路的复杂度变化进行打分

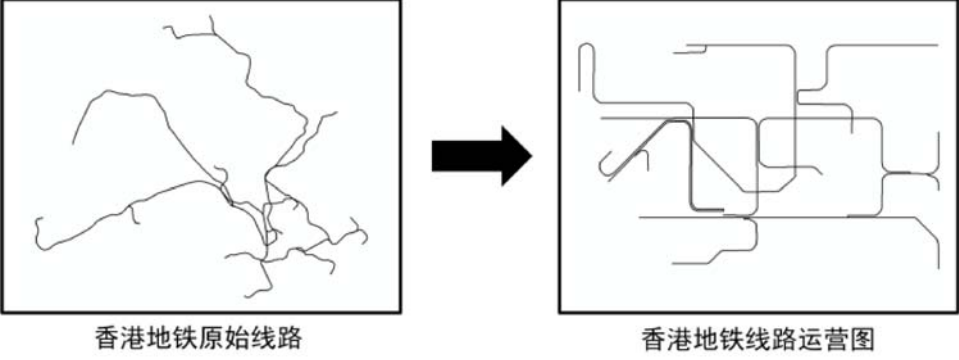

[矩阵量表题] \*

|       |                       |                       |                       |                       |                       |
|-------|-----------------------|-----------------------|-----------------------|-----------------------|-----------------------|
|       | 1 (非常小)               | 2 (较小)                | 3 (中等)                | 4 (较大)                | 5 (非常大)               |
| 复杂度变化 | <input type="radio"/> |

9. 请对成都地铁线路运营图相对于原始线路的复杂度变化进行打分

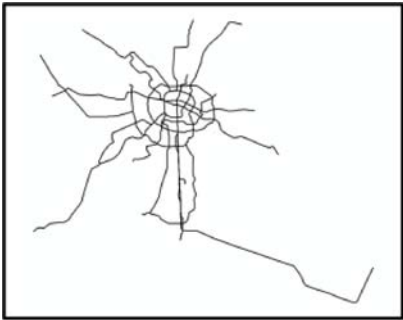

成都地铁原始线路

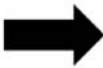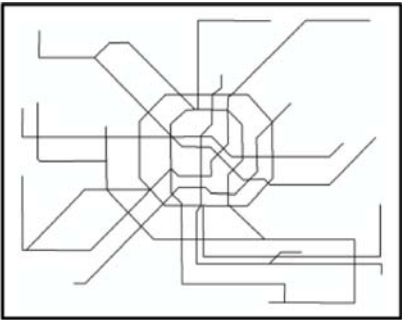

成都地铁线路运营图

[矩阵量表题] \*

|       | 1 (非常小)               | 2 (较小)                | 3 (中等)                | 4 (较大)                | 5 (非常大)               |
|-------|-----------------------|-----------------------|-----------------------|-----------------------|-----------------------|
| 复杂度变化 | <input type="radio"/> |

10. 请对杭州地铁线路运营图相对于原始线路的复杂度变化进行打分

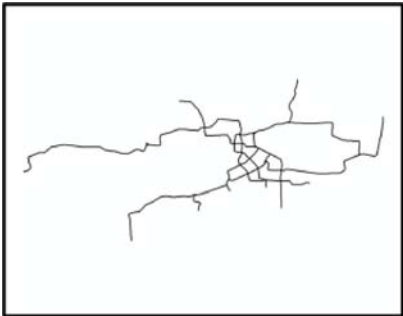

杭州地铁原始线路

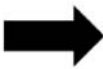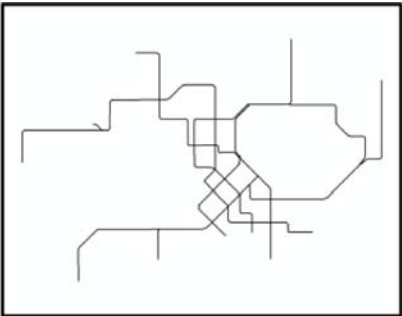

杭州地铁线路运营图

[矩阵量表题] \*

|       | 1 (非常小)               | 2 (较小)                | 3 (中等)                | 4 (较大)                | 5 (非常大)               |
|-------|-----------------------|-----------------------|-----------------------|-----------------------|-----------------------|
| 复杂度变化 | <input type="radio"/> |

11. 请对南京地铁线路运营图相对于原始线路的复杂度变化进行打分

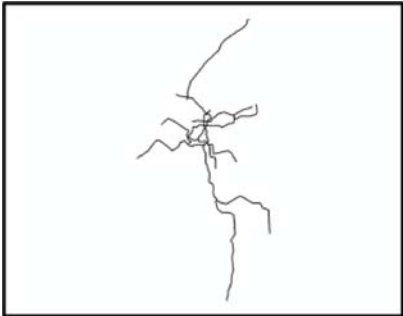

南京地铁原始线路

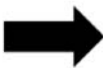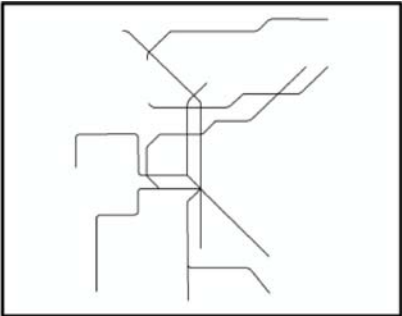

南京地铁线路运营图

[矩阵量表题] \*

|       | 1 (非常小)               | 2 (较小)                | 3 (中等)                | 4 (较大)                | 5 (非常大)               |
|-------|-----------------------|-----------------------|-----------------------|-----------------------|-----------------------|
| 复杂度变化 | <input type="radio"/> |

12. 请对武汉地铁线路运营图相对于原始线路的复杂度变化进行打分

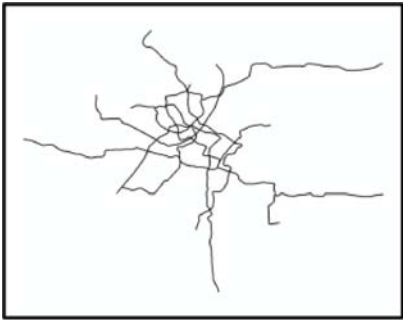

武汉地铁原始线路

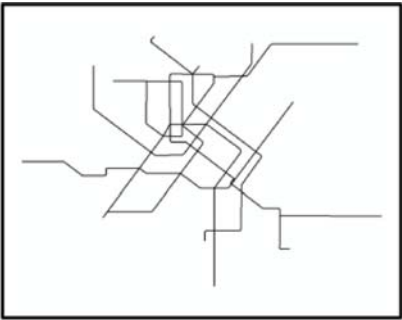

武汉地铁线路运营图

[矩阵量表题] \*

|       | 1 (非常小)               | 2 (较小)                | 3 (中等)                | 4 (较大)                | 5 (非常大)               |
|-------|-----------------------|-----------------------|-----------------------|-----------------------|-----------------------|
| 复杂度变化 | <input type="radio"/> |

13. 请对天津地铁线路运营图相对于原始线路的复杂度变化进行打分

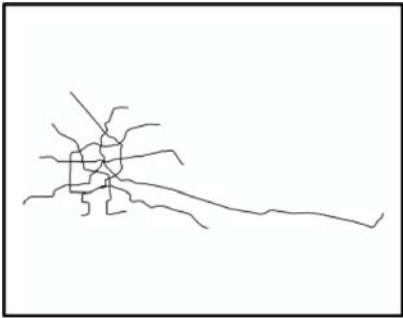

天津地铁原始线路

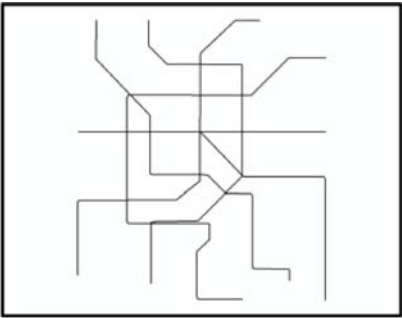

天津地铁线路运营图

[矩阵量表题] \*

|       | 1 (非常小)               | 2 (较小)                | 3 (中等)                | 4 (较大)                | 5 (非常大)               |
|-------|-----------------------|-----------------------|-----------------------|-----------------------|-----------------------|
| 复杂度变化 | <input type="radio"/> |

14. 请对重庆地铁线路运营图相对于原始线路的复杂度变化进行打分

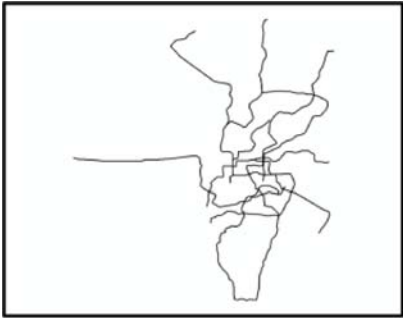

重庆地铁原始线路

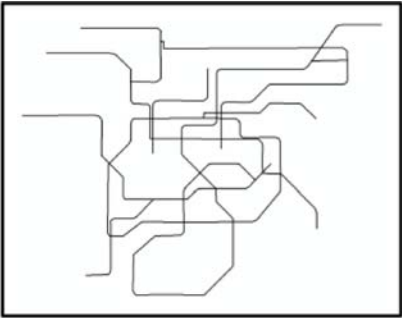

重庆地铁线路运营图

[矩阵量表题] \*

|       | 1 (非常小)               | 2 (较小)                | 3 (中等)                | 4 (较大)                | 5 (非常大)               |
|-------|-----------------------|-----------------------|-----------------------|-----------------------|-----------------------|
| 复杂度变化 | <input type="radio"/> |

15. 请对长沙地铁线路运营图相对于原始线路的复杂度变化进行打分

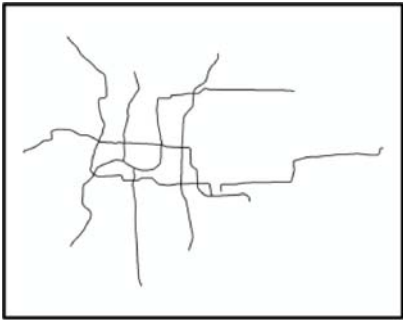

长沙地铁原始线路

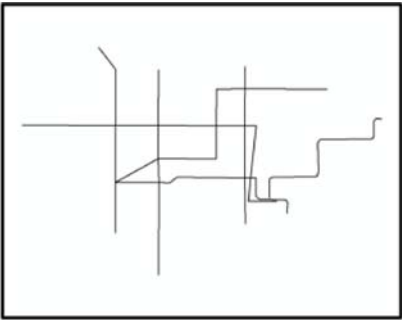

长沙地铁线路运营图

[矩阵量表题] \*

|       | 1 (非常小)               | 2 (较小)                | 3 (中等)                | 4 (较大)                | 5 (非常大)               |
|-------|-----------------------|-----------------------|-----------------------|-----------------------|-----------------------|
| 复杂度变化 | <input type="radio"/> |

16. 请对西安地铁线路运营图相对于原始线路的复杂度变化进行打分

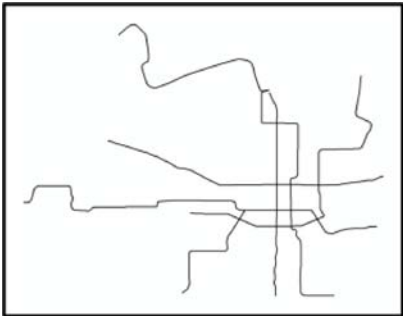

西安地铁原始线路

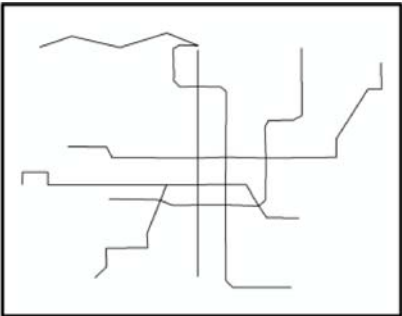

西安地铁线路运营图

[矩阵量表题] \*

|       | 1 (非常小)               | 2 (较小)                | 3 (中等)                | 4 (较大)                | 5 (非常大)               |
|-------|-----------------------|-----------------------|-----------------------|-----------------------|-----------------------|
| 复杂度变化 | <input type="radio"/> |

17. 请对宁波地铁线路运营图相对于原始线路的复杂度变化进行打分

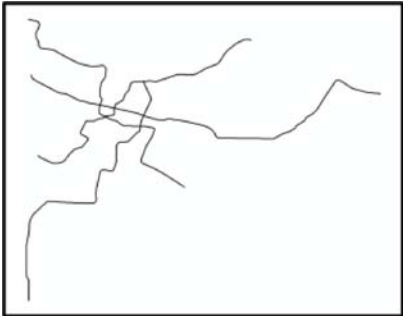

宁波地铁原始线路

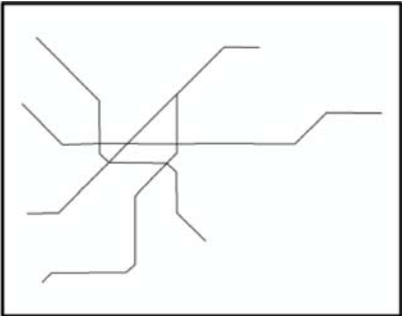

宁波地铁线路运营图

[矩阵量表题] \*

|       | 1 (非常小)               | 2 (较小)                | 3 (中等)                | 4 (较大)                | 5 (非常大)               |
|-------|-----------------------|-----------------------|-----------------------|-----------------------|-----------------------|
| 复杂度变化 | <input type="radio"/> |

18. 请对沈阳地铁线路运营图相对于原始线路的复杂度变化进行打分

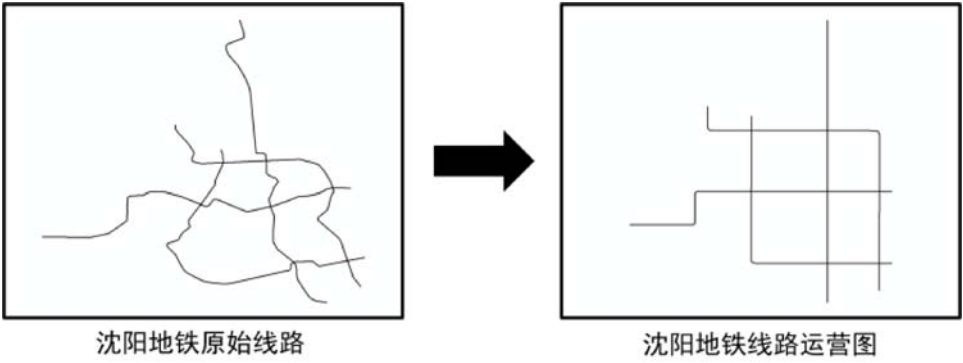

[矩阵量表题] \*

|       |                       |                       |                       |                       |                       |
|-------|-----------------------|-----------------------|-----------------------|-----------------------|-----------------------|
|       | 1 (非常小)               | 2 (较小)                | 3 (中等)                | 4 (较大)                | 5 (非常大)               |
| 复杂度变化 | <input type="radio"/> |

19. 请对昆明地铁线路运营图相对于原始线路的复杂度变化进行打分

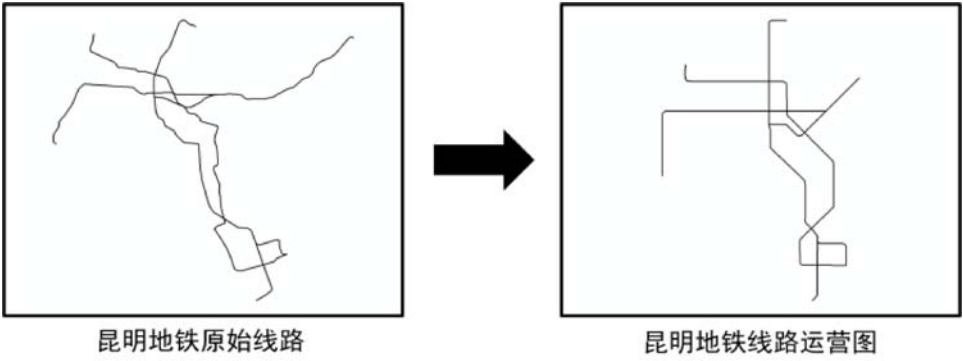

[矩阵量表题] \*

|       |                       |                       |                       |                       |                       |
|-------|-----------------------|-----------------------|-----------------------|-----------------------|-----------------------|
|       | 1 (非常小)               | 2 (较小)                | 3 (中等)                | 4 (较大)                | 5 (非常大)               |
| 复杂度变化 | <input type="radio"/> |

20. 请对郑州地铁线路运营图相对于原始线路的复杂度变化进行打分

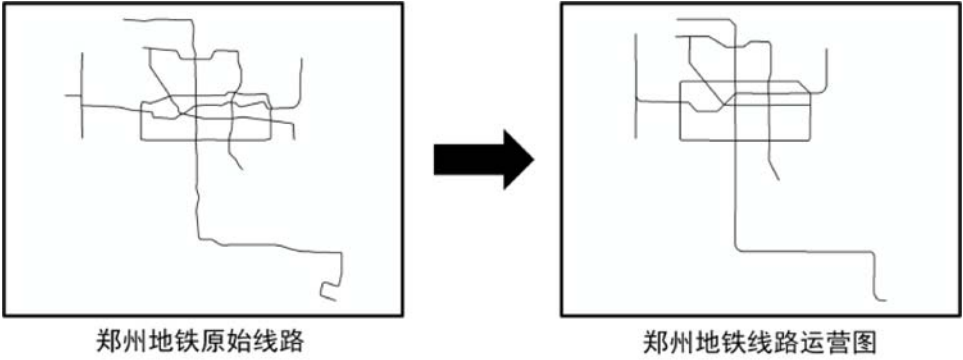

[矩阵量表题] \*

|       |                       |                       |                       |                       |                       |
|-------|-----------------------|-----------------------|-----------------------|-----------------------|-----------------------|
|       | 1 (非常小)               | 2 (较小)                | 3 (中等)                | 4 (较大)                | 5 (非常大)               |
| 复杂度变化 | <input type="radio"/> |

21. 请对大连地铁线路运营图相对于原始线路的复杂度变化进行打分

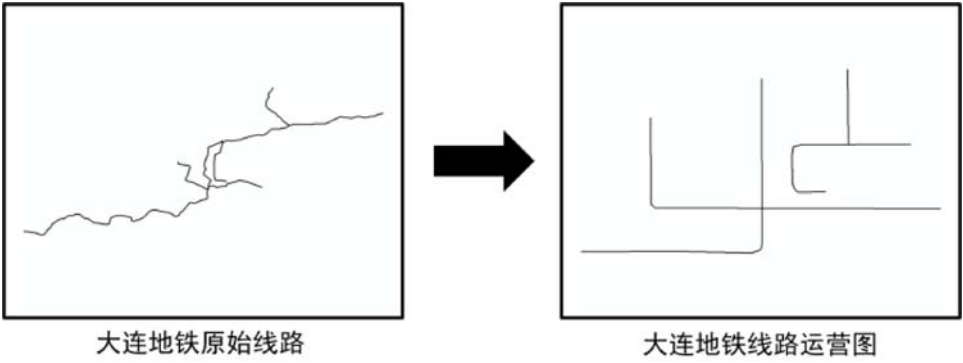

[矩阵量表题] \*

|       |                       |                       |                       |                       |                       |
|-------|-----------------------|-----------------------|-----------------------|-----------------------|-----------------------|
|       | 1 (非常小)               | 2 (较小)                | 3 (中等)                | 4 (较大)                | 5 (非常大)               |
| 复杂度变化 | <input type="radio"/> |

22. 请对苏州地铁线路运营图相对于原始线路的复杂度变化进行打分

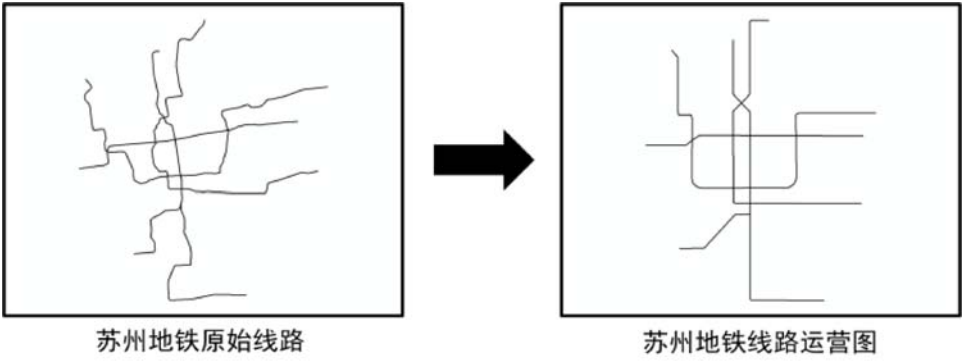

[矩阵量表题] \*

|       |                       |                       |                       |                       |                       |
|-------|-----------------------|-----------------------|-----------------------|-----------------------|-----------------------|
|       | 1 (非常小)               | 2 (较小)                | 3 (中等)                | 4 (较大)                | 5 (非常大)               |
| 复杂度变化 | <input type="radio"/> |

23. 请对南昌地铁线路运营图相对于原始线路的复杂度变化进行打分

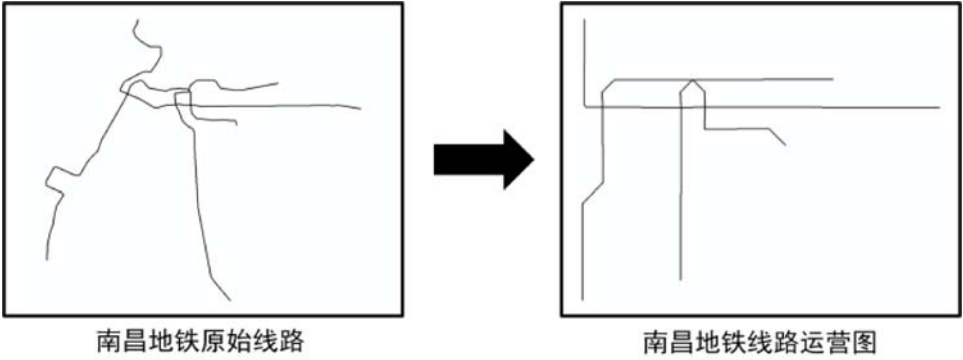

[矩阵量表题] \*

|       |                       |                       |                       |                       |                       |
|-------|-----------------------|-----------------------|-----------------------|-----------------------|-----------------------|
|       | 1 (非常小)               | 2 (较小)                | 3 (中等)                | 4 (较大)                | 5 (非常大)               |
| 复杂度变化 | <input type="radio"/> |

24. 请对长春地铁线路运营图相对于原始线路的复杂度变化进行打分



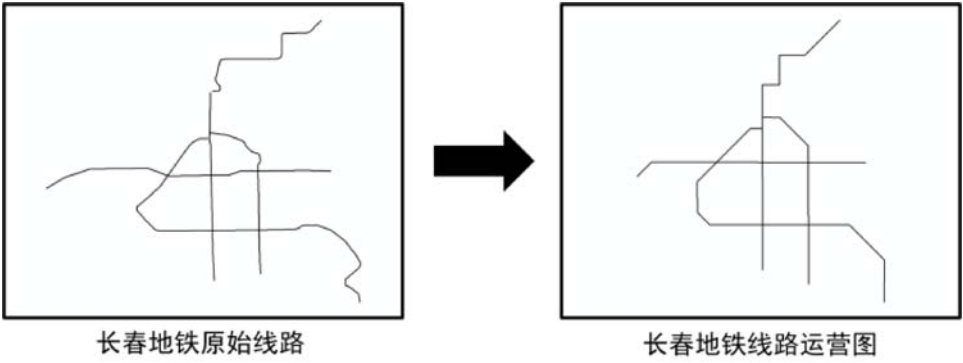

[矩阵量表题] \*

|       |                       |                       |                       |                       |                       |
|-------|-----------------------|-----------------------|-----------------------|-----------------------|-----------------------|
|       | 1 (非常小)               | 2 (较小)                | 3 (中等)                | 4 (较大)                | 5 (非常大)               |
| 复杂度变化 | <input type="radio"/> |

25. 请对无锡地铁线路运营图相对于原始线路的复杂度变化进行打分

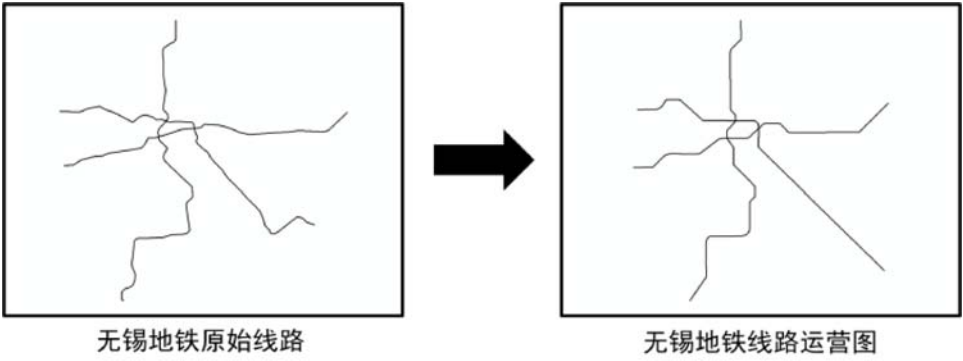

[矩阵量表题] \*

|       |                       |                       |                       |                       |                       |
|-------|-----------------------|-----------------------|-----------------------|-----------------------|-----------------------|
|       | 1 (非常小)               | 2 (较小)                | 3 (中等)                | 4 (较大)                | 5 (非常大)               |
| 复杂度变化 | <input type="radio"/> |

26. 请对厦门地铁线路运营图相对于原始线路的复杂度变化进行打分

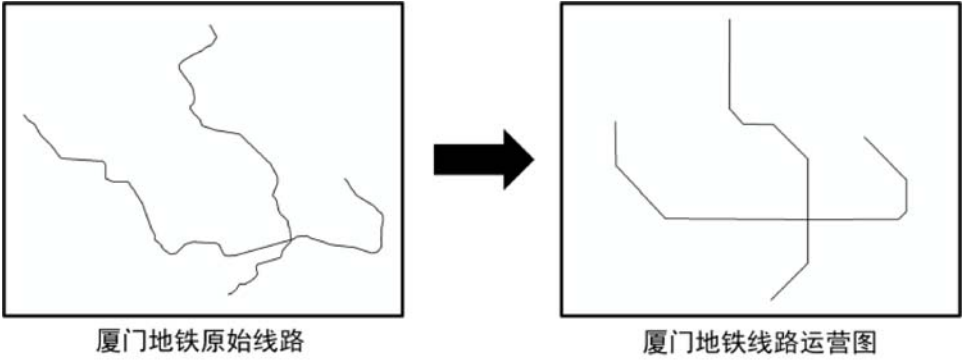

[矩阵量表题] \*

|       |                       |                       |                       |                       |                       |
|-------|-----------------------|-----------------------|-----------------------|-----------------------|-----------------------|
|       | 1 (非常小)               | 2 (较小)                | 3 (中等)                | 4 (较大)                | 5 (非常大)               |
| 复杂度变化 | <input type="radio"/> |

27. 请对合肥地铁线路运营图相对于原始线路的复杂度变化进行打分

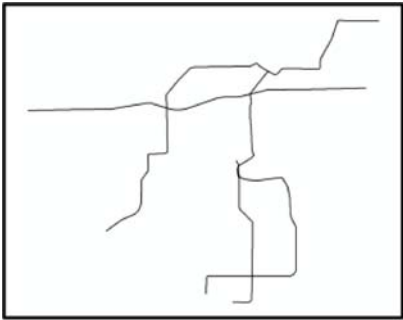

合肥地铁原始线路

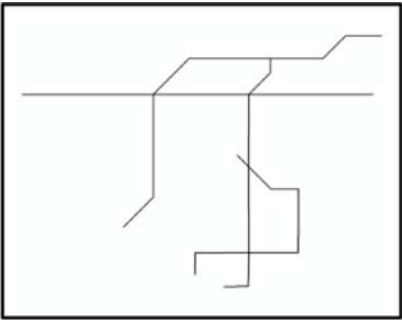

合肥地铁线路运营图

[矩阵量表题] \*

|       | 1 (非常小)               | 2 (较小)                | 3 (中等)                | 4 (较大)                | 5 (非常大)               |
|-------|-----------------------|-----------------------|-----------------------|-----------------------|-----------------------|
| 复杂度变化 | <input type="radio"/> |

28. 请对福州地铁线路运营图相对于原始线路的复杂度变化进行打分

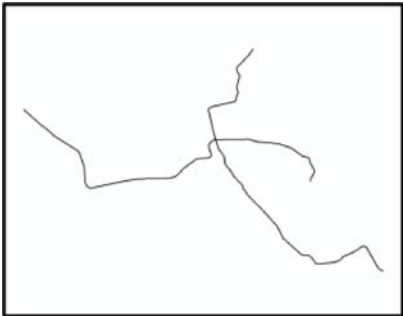

福州地铁原始线路

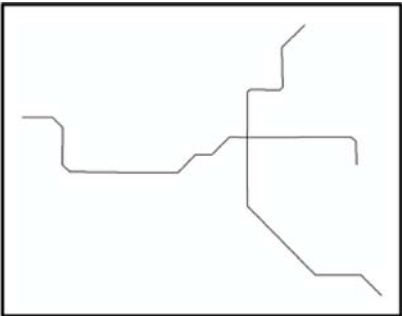

福州地铁线路运营图

[矩阵量表题] \*

|       | 1 (非常小)               | 2 (较小)                | 3 (中等)                | 4 (较大)                | 5 (非常大)               |
|-------|-----------------------|-----------------------|-----------------------|-----------------------|-----------------------|
| 复杂度变化 | <input type="radio"/> |

29. 请对南宁地铁线路运营图相对于原始线路的复杂度变化进行打分

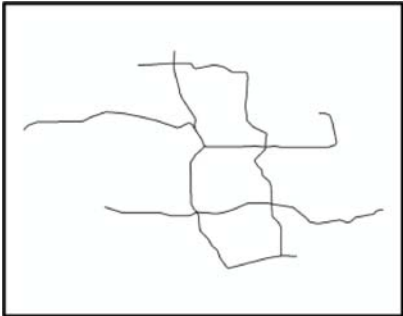

南宁地铁原始线路

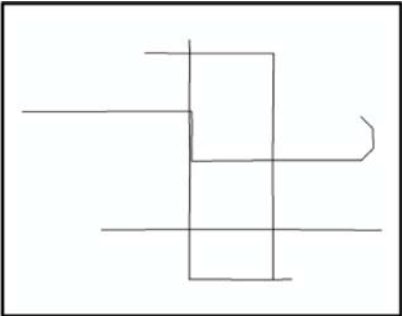

南宁地铁线路运营图

[矩阵量表题] \*

|       | 1 (非常小)               | 2 (较小)                | 3 (中等)                | 4 (较大)                | 5 (非常大)               |
|-------|-----------------------|-----------------------|-----------------------|-----------------------|-----------------------|
| 复杂度变化 | <input type="radio"/> |
